# Supplementary material for: Adhesion and anti-inflammatory potential ofLactobacillus rhamnosusGG in a sea buckthorn based beverage matrix
Source: Royal Society of Chemistry journal article supplement (doi:10.1039/c9fo02249j), 2020-01-01
Supplement: c9fo02249j1.pdf [file c9fo02249j1.pdf]

### SUPPLEMENTARY FILE

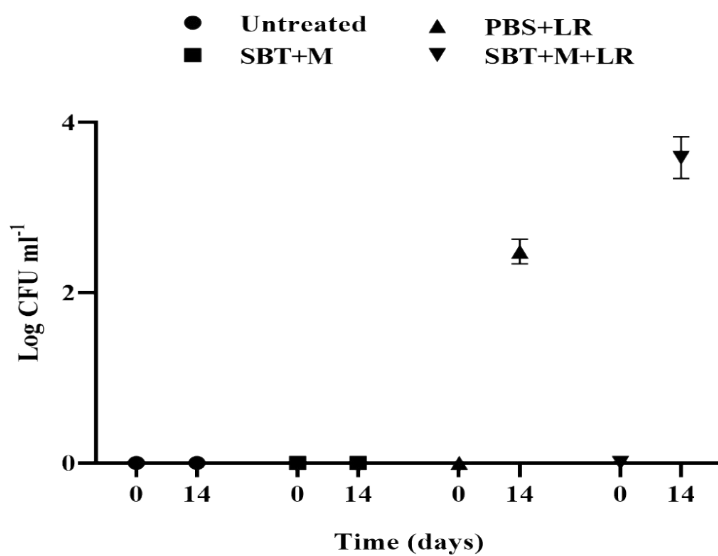

**Fig. S1:** Viable counts of *Lactobacillus* strain in MRS media recovered from zebrafish intestines from a) untreated b) SBT+M, c) PBS+LR and d) SBT+M+LR treated groups post 14 days of feeding.
